# Supplementary material for: Tuning selectivity in macrotricyclic carbohydrate receptors; CH ? N mutations in aromatic spacersElectronic supplementary information (ESI) available: experimental details for the synthesis of receptors 3 and 4, binding studies of receptors 3 and 4 with monosaccharide 2, and extraction experiments. See http://www.rsc.org/suppdata/ob/b3/b315447e/
Source: Royal Society of Chemistry journal article supplement (doi:10.1039/b315447e), 2004-01-01
Supplement: b315447e.doc [file b315447e.doc]

Supplementary data

Tuning selectivity in macrotricyclic carbohydrate receptors; CH  N mutations in aromatic spacers

Trinidad Velasco,*a* Gregory Lecollinet,*a* Theo Ryan*b* and Anthony P. Davis**a*

a School of Chemistry, University of Bristol, Cantock’s Close, Bristol BS8 1TS - UK . Fax: (+44)117-929-8611; E-mail: Anthony.Davis@bristol.ac.uk

b Department of Chemistry, Trinity College, Dublin 2 - Ireland

**Contents:**

1. Synthetic procedures and analytical data for **8**-**13** and receptors **3** and **4**
2. 1H-NMR spectral changes and titration curve of receptor **3** and **4** with guest **2**
3. Fluorescence emission spectral changes and titration curves of receptor **3** and **4** with guest **2**
4. Typical procedure for extraction of sugar from aqueous solution into organic solvents

**1- Synthetic procedures and analytical data for 8-13 and receptors 3 and 4**

1H-NMR, 13C-NMR and 19F-NMR spectra were obtained using a Bruker DPX-400 MHz, a JEOL/Delta GX-400 MHz, a JEOL/Eclipse-400 MHz or a JEOL/Lambda 300. Chemical shifts () are calibrated relative to solvent residual peaks. Mass spectra were recorded on a VG Analytical Autospec instrument equipped with a FAB positive source. Fluorescence binding studies were carried out using a Perkin-Elmer LS-50 instrument. Reactions were monitored by thin layer chromatography (TLC) on Merck silica gel 60-F254 plates. Flash column chromatography was carried out on Merck silica gel 60 (particle size 0.040-0.063 mm). Commercial reagents were purchased from Aldrich, Sigma, Stem or Fluka and were used without further purification unless otherwise specified.

**4-Hydroxypyridine-2,6-dicarboxylic acid dibenzyl ester 8.** Oxalyl chloride (1.5 mL, 17.6 mmol) was added dropwise to a suspension of chelidamic acid monohydrate **7** (1 g, 4.98 mmol) and dry DMF (0.2 mL, 2.58 mmol) in dry THF (40 mL) under argon, in a flask provided with an outlet to vent gas liberated during the reaction and cooled in an ice-salt bath. The suspension was transformed into a clear solution. The ice-salt bath was removed after 15 min and the reaction mixture was allowed to stir for 50 min. A solution of benzyl alcohol (1.1 mL, 10.95 mmol, previously distilled and dried over molecular sieves) and *i*Pr2NEt (3.5 mL, 20 mmol) in dry THF (5 mL) was added slowly. The reaction mixture was allowed to stir at r.t. for 60 h. The solvent was evaporated under reduced pressure to give an oil that was taken up in DCM (50 mL) and washed with HCl aq. (0.5 m, 100 mL). The aqueous phase was extracted with DCM(3 x 50 mL)and the combined organic layers were washed with water (2 x 100 mL) until neutral pH, dried (Na2SO4) and filtered. The solvent was removed in vacuo and the crude material obtained was crystallised from methanol to give **8** (1.35 g, 72 %)as white crystals. Rf = 0.25 (ethyl acetate/hexane 1: 2); m.p. = 122 oC; 1H NMR (400 MHz, CDCl3):  = 5.43 (s, 4 H; CH2Ph), 7.39-7.42 (m, 12 H; ArH + PyrH), 9.60 (bs, 1 H; PyrOH); 13C NMR (100 MHz, CDCl3):  68.2 (CH2Ph), 118.2 (Pyr CH), 127.7 (PyrC), 128.3 (ArC), 128.4, 128.5, 128.6 (ArCH), 134.4 (PyrC), 163.0 (CO); IR (film from CH2Cl2): max = 1727 cm-1, (CO); MS (TOF ES+): m/z (%): 364 (100) [M + H]+; elemental analysis calcd. (%) for C21H17NO5 (363.36): C 69.41 H 4.72 N 3.85; found C 69.25 H 4.76 N 3.72.

**Pentyl Bromoacetate**. Bromoacetyl bromide (2.1 mL, 24.5 mmol) was added dropwise to a solution of n-pentanol (3 mL, 24.5 mmol, previously distilled and dried over molecular sieves) and *i*Pr2NEt (4.7 mL, 27 mmol) in dry THF (15 mL) under argon and cooled in an ice bath. After addition, the ice bath was removed and the reaction mixture was allowed to stir at r.t. for 2 h. The precipitated salts were filtered and the filtrate was concentrated under reduced pressure to a crude oil that was taken up in DCM (50 mL) and washed with HCl aq. (0.1 m, 100 mL) The aqueous layer was extracted with DCM (2 x 25 mL) and the combined organic layers were washed with water (2 x 100 mL) until neutral pH, dried (Na2SO4), filtered and concentrated in vacuo to an oil. The oil was purified by flash column chromatography (eluent hexane/ethyl acetate 9:1) to give the desired bromoester (4.3 g, 85 %) as a colourless oil. Rf = 0.8 (ethyl acetate/hexane 1:5); 1H NMR (400 MHz, CDCl3):  = 0.88-0.91 (t, 3J(H, H) = 7 Hz, 3 H; CH3), 1.31-1.36 (m, 4 H; C2H4CH3), 1.64-1.67 (m, 2 H; CH2C3H7), 3.83 (s, 2 H; BrCH2), 4.13-4.17 (t, 3J(H, H) = 7 Hz, 2 H; OCH2C4H9); 13C NMR (100 MHz, CDCl3,):  = 13.6 (CH3), 25.1, 26.4, 27.4 (CH2), 27.6 (BrCH2), 65.9 (CH2), 166.8 (CO); IR (film from CH2Cl2): max 2341 cm-1 (CO); MS (FAB+): m/z (%): 209 (90) [M]+

**Dibenzyl 4-pentyloxycarbonylmethoxypyridine-2,6-dicarboxylate 9.** Finely ground K2CO3 (679 mg, 4.9 mmol) was added to a solution of **8** (1.19 g, 3.27 mmol) in acetone (45 mL). The mixture was allowed to stir at r.t. for 45 min and pentyl bromoacetate (821 mg, 3.5 mmol) was added. The reaction mixture was allowed to stir overnight and the solvent was removed under reduced pressure. The residue was dissolved in both DCM (50 mL) and water (70 mL). The aqueous layer was extracted with DCM (50 mL) and the combined organic layers were washed with water (100 mL) until neutral pH, dried (Na2SO4) and filtered. The solvent was evaporated to give a crude solid material that was purified by flash column chromatography (eluent hexane/ethyl acetate 4:1) to give the desired product **9** (1.6 g, 97 %)as a white solid. Rf = 0.75 (hexane/ethyl acetate 1:2); 1H NMR (400 MHz, CDCl3):  = 0.87-0.91 (t, 3J(H, H) = 7 Hz, 3 H; CH3), 1.27-1.32 (m, 4 H; C2H4CH3), 1.61-1.65 (m, 2 H; CH2C3H7), 4.17-4.21 (t, 3J(H, H) = 7 Hz, 2 H; OCH2C4H9), 4.77 (s, 2 H; OCH2CO2R), 5.44 (s, 4 H; OCH2Ph), 7.34-7.48 (m, 10 H; CH2C6H5), 7.78 (s, 2 H; PyrH).; 13C NMR (100 MHz, CDCl3):  = 13.4 (CH3), 21.7, 27.4, 27.7, 64.6 (CH2), 65.5 (OCH2CO2R), 67.3 (CH2Ph) 114.0 (PyrCH), 127.0, 128.0, 128.1 (ArCH), 135.0 (ArC), 149.7, 163.7 (PyrC), 163.4, 166.7 (CO); IR (film from CH2Cl2): max = 2339, 2418 cm-1 (CO); MS (TOF ES+): m/z (%): 492 (100) [M + H]+; elemental analysis calcd (%) for C28H29NO7 (491.54): C 68.42 H 5.95 N 2.85; found C 68.41 H 5.85 N 2.76.

**4-Pentyloxycarbonylmethoxypyridine-2,6-dicarboxylic acid 10.** Activated Pd on C (10 % w/w, 254 mg, 14 % w/w with respect to **9**) was added to a solution of **9** (1.84 g, 3.74 mmol) in ethyl acetate (100 mL) and the reaction mixture was allowed to stir overnight at r.t. under a H2 atmosphere supplied from a balloon. The Pd catalyst was removed by filtration over celite, washed with ethyl acetate (100 mL) and the filtrate was evaporated under reduced pressure to yield the desired diacid **10** (1.13 g, 97 %)as a white solid. M.p. (from crystallization in toluene) = 138 oC; 1H NMR (400 MHz, [D6]DMSO):  = 0.82-0.86 (t, 3J(H, H) = 7 Hz, 3 H; CH3), 1.23-1.27 (m, 4 H; C2H4CH3), 1.53–1.57 (m, 2 H; CH2C3H7), 4.13-4.17 (t, 3J(H, H) = 7 Hz, 2 H; OCH2C4H9), 5.13 (s, 2 H; OCH2CO2R), 7.71 (s, 2 H; PyrH); 13C NMR (100 MHz, [D6]DMSO):  = 13.7 (CH3), 21.7, 27.4, 27.7, 64.9 (CH2), 65.0 (OCH2CO2R), 113.4 (PyrCH), 150.1, 165.3 (PyrC), 166.1, 167.9 (CO).; IR (film from CH2Cl2): max = 3407 (COOH), 2351 cm-1 (CO); MS (TOF ES+): m/z (%): 312 (100) [M + H]+; elemental analysis calcd. (%) for C14H17NO7 (311.29): C 54.02 H 5.50 N 4.50; found C 53.91 H 5.23 N 4.33.

**Bis-pentafluorophenyl 4-pentyloxycarbonylmethoxypyridine-2,6-dicarboxylate 11.** DCC (1.34 g, 6.42 mmol) was added over a period of 20 min to a solution of **10** (1 g, 3.21 mmol), pentafluorophenol (1.44 g, 7.8 mmol) and DMAP (18 mg, 0.15 mmol, 5 % w/w) in dry THF (10 mL) containing activated molecular sieves, under argon and cooled in an ice bath. The ice bath was removed and the reaction mixture was allowed to reach r.t. and stirred overnight. The white precipitate was filtered and the filtrate was concentrated in vacuo to give an oil that was purified by column chromatography (eluent hexane/ethyl acetate 5:2). The desired product **11** (1.15 g, 56 %) was obtained as a white solid. Rf = 0.9 (ethyl acetate/hexane 1:2); m.p. (from crystallization in DCM/hexane) = 60-62 oC; 1H NMR (400 MHz, CDCl3):  = 0.89-0.93 (t, 3J(H, H) = 7 Hz, 3 H; CH3), 1.28-1.37 (m, 4 H; C2H4CH3), 1.68-1.73 (m, 2 H; CH2C3H7), 4.23-4.29 (t, 3J(H, H) = 7 Hz, 2 H; OCH2C4H9), 4.90 (s, 2 H; OCH2CO2R), 8.03 (s, 2 H; PyrH); 13C NMR (100 MHz, CDCl3):  = 13.4 (CH3), 21.7, 27.4, 27.7, 64.4 (CH2), 65.9 (OCH2CO2R), 116.3 (PyrCH), 147.3, 159.9 (PyrC), 165.9, 166.3 (CO); 19F NMR (CDCl3, 282.2 MHz): -162.23-(-162.33) (t, 2 F; ArF), -157.475-(-157.34) (t, 1 F; ArF), -152.18-(-152.13) (d, 2 F; ArF); IR : max = 1755, 1740 cm-1 (CO); MS (FAB+): m/z (%): 644 (100) [M + H]+; elemental analysis calcd. (%) for C26H15F10NO7 (643.39): C 48.54 H 2.35 N 2.18; found C 48.54 H 2.25 N 2.18.

**Tetra-N-Boc macrocyclic intermediate 12.**[[1]](#footnote-2)A solution of isophthaloyl spacer **6Error: Reference source not found** (291 mg, 0.48 mmol) in dry THF (270 mL, [**6**] ~ 1.5 mM) was added dropwise over 5 h to a suspension of 3,5-bis(aminomethyl)-3′,5′-bis[(*N*-*tert*-butyloxycarbonyl)aminomethyl]biphenyl[[2]](#footnote-3) (230 mg, 0.48 mmol, previously dissolved in dry DMF (4 mL)) and *i*Pr2NEt (0.5 mL, 2.8 mmol) in dry THF (140 mL, [diamine] ~ 3 mM) under N2 and at r.t. The reaction mixture was stirred vigorously at r.t. for 18 h. The solvent was removed under reduced pressure (adding toluene (3 x 15 mL) to facilitate DMF removal) to give a solid crude that was taken up in ethyl acetate (50 mL) and washed with HCl aq. (0.5 N, 60 mL), NaHCO3 saturated aqueous solution (60 mL) and brine (50 mL). The organic phase was dried (Na2SO4), filtered and concentrated in vacuo to give a solid that was purified by flash column chromatography (eluent CHCl3/methanol 98:2). The desired macrocycle **12** (270 mg, 80 %) was obtained as a light brown solid. Rf = 0.3 (CHCl3/methanol 97:3); 1H NMR (400 MHz, [D6]DMSO):  = 0.87-0.90 (t, 3J(H, H) = 7 Hz, 6 H; CH3), 1.34-1.36 (m, 8 H; C2H4CH3), 1.39 (s, 36 H; C(CH3)3), 1.72–1.75 (m, 4 H; CH2C3H7), 4.17-4.19 (d, 8 H; CH2NHtBoc), 4.31-4.33 (t, 3J(H, H) = 7 Hz, 4 H; OCH2C4H9), 4.52-4.53 (d, 8 H; CH2NHCOAr), 7.11 (s, 2 H; ArH), 7.20 (s, 2 H; ArH), 7.40 (s, 4 H; ArH), 7.42-7.45 (t, 4 H; NHtBoc), 7.50 (s, 4 H; ArH), 8.54 (s, 4 H; ArH-spacer), 8.57 (s, 2 H; ArH-spacer), 9.37-9.39 (t, 4 H; NHCOAr); 13C NMR (100 MHz, [D6]DMSO):  = 13.8 (CH3), 21.8, 27.5, 27.8 (CH2), 28.2 (C(CH3)3), 42.8 (CH2NHCOAr), 43.4 (CH2NHtBoc), 65.5 (CH2), 77.8 (C(CH3)3), 123.8, 124.6, 124.7, 124.9, 130.2, 130.3 (ArCH), 134.6, 139.7, 140.1, 140.3, 140.9 (ArC), 155.8, 164.3, 164.8 (CO); IR: max = 3330 (NH), 1721, 1683, 1645 (CO), 1523 cm-1 (NH); HRMS (FAB): *m/z* mass calcd for C80H100N8O16Na 1451.7155, found 1451.7152.

**Macrotricycle 3.** TFA (2.5 mL, 50 %) was added to a suspension of macrocyclic tetra-N-Boc intermediate **12** (268 mg, 0.18 mmol) in DCM (2.5 mL) under N2 and cooled in an ice bath. The reaction mixture was allowed to reach r.t. and stirred for 2 h. The volatiles were removed under reduced pressure to give a crude oil that was triturated in diethyl ether. The white precipitate was filtered to yield the corresponding tetra-amine TFA salt (250 mg, 93 %) as a white powder. 1H NMR (400 MHz, [D6]DMSO):  = 0.88-0.91 (t, 3J(H, H) = 7 Hz, 6 H; CH3), 1.35-1.39 (m, 8 H; C2H4CH3), 1.74–1.78 (m, 4 H; CH2C3H7), 4.15 (bs, 8 H; CH2NH3+TFA), 4.30-4.33 (t, 3J(H, H) = 7 Hz, 4 H; OCH2C4H9), 4.56 (s, 8 H; CH2NHCOAr), 7.20 (s, 2 H; ArH), 7.48 (s, 2 H; ArH), 7.58 (s, 4 H; ArH), 7.88 (s, 4 H; ArH), 8.35 (bs, 12 H; NH3+TFA), 8.54 (s, 4 H; ArH-spacer), 8.61 (s, 2 H; ArH-spacer), 9.41 (t, 4 H; NHCOAr). A solution of dipicolinoyl spacer **11** (210 mg, 0.336 mmol) in dry THF (380 mL, [**11**] ~ 0.5 mM) was added dropwise over 8 h to a solution of the above tetra-amine TFA salt (250 mg, 0.168 mmol, previously dissolved in dry DMF (10 mL)) and *i*Pr2NEt (0.74 mL, 4.25 mmol) in dry THF (380 mL, [tetra-amine salt] ~ 0.25 mM) under N2 and at r.t. The reaction mixture was stirred vigorously for 60 h at r.t. The solvent was removed under reduced pressure (adding toluene (3 x 15 mL) to facilitate DMF removal) to give a crude solid that was taken up in CHCl3 (50 mL) and washed with HCl aq. (1 N, 50 mL). The aqueous layer was extracted with CHCl3 (2 x 50 mL) and the combined organic layers were washed with NaHCO3 saturated aqueous solution (100 mL), brine (100 mL), dried (Na2SO4) and filtered. Removal of the solvent in vacuo gave a solid that was purified by flash column chromatography (eluent CHCl3/methanol 98:2). The desired macrotricycle **3** (60 mg, 23 %) was obtained as a white solid. R**f** = 0.3 (DCM/methanol 96:4); 1H NMR (400 MHz, CDCl3/CD3OH 92:8):  = 0.80-0.83 (t, 3J(H, H) = 7 Hz, 6 H; CH3), 0.83-0.86 (t, 3J(H, H) = 7 Hz, 6 H; CH3), 1.17-1.34 (m, 16 H; C2H4CH3), 1.58-1.62 (m, 4 H; CH2C3H7) 1.70-1.74 (m, 4 H; CH2C3H7), 4.12-4.15 (t, 3J(H, H) = 7 Hz, 4 H; OCH2C4H9), 4.26-4.29 (t, 3J(H, H) = 7 Hz, 4 H; OCH2C4H9), 4.38-4.65 (m, 16 H; CH2NHCO), 4.79 (s, 4 H; OCH2CO2R), 7.05 (s, 2 H; ArH), 7.22 (s, 2 H; ArH), 7.55 (s, 4 H; ArH), 7.63 (s, 4 H; ArH), 7.72 (s, 4 H; PyrH), 7.79 (s, 2 H; ArH-spacer), 8.22 (bs, 4 H; NHCOAr), 8.47 (s, 4 H; ArH-spacer), 8.84 (bs, 4 H; NHCOPyr); 13C NMR (100 MHz, CDCl3/CD3OH 92:8):  = 13.5, 13.6 (CH3), 21.9, 22.0, 27.6, 27.8, 27.9 (CH2), 43.7, 44.7 (CH2NHCO), 64.9 (CH2), 66.3 (OCH2CO2R), 112.1 (PyrCH), 125.5, 126.2, 128.7, 128.8, 129.1, 132.3 (ArCH), 135.6, 138.8, 140.2, 140.3, 140.9 (ArC), 152.1, 159.8 (PyrC) 164.7, 166.9, 167.0, 168.3 (CO); HRMS (FAB+): m/z mass calcd for C88H94N10O18 1578.6747 found 1578.6758.

**Tetra N-Boc macrocyclic intermediate 13.** A solution of dipicolinoyl spacer **11** (342 mg, 0.57 mmol) in dry THF (370 mL, [**11**] ~ 1.5 mM) was added dropwise over 8 h to a solution of 3,5-bis(aminomethyl)-3′,5′-bis[(*N*-*tert*-butyloxycarbonyl)aminomethyl]biphenylError: Reference source not found (270 mg, 0.57 mmol, previously dissolved in dry DMF (10 mL)) and *i*Pr2NEt (0.6 mL, 3.44 mmol) in dry THF (200 mL, [diamine] ~ 3 mM) under N2 and at r.t. The reaction mixture was stirred vigorously at r.t. overnight and the solvent was removed under reduced pressure (adding toluene (3 x 15 mL) to facilitate DMF removal). The residue was taken up in ethyl acetate (60 mL) and washed with HCl aq. (1 m, 80 mL). The aqueous phase was extracted with ethyl acetate (40 mL) and the combined organic layers were washed with NaHCO3 saturated aqueous solution (100 mL), water (100 mL), dried (Na2SO4) and filtered. The solvent was removed invacuo to give a solid that was purified by flash column chromatography (eluent CHCl3/methanol 97:3). The desired product **13** (130 mg, 62 %) was obtained as a white powder. Rf = 0.2 (DCM/methanol 97:3); 1H NMR (400 MHz, [D6]DMSO):= 0.79-0.80 (t, 3J(H, H) = 7 Hz, 6 H; CH3), 1.34-1.36 (m, 8 H; C2H4CH3), 1.39 (s, 36 H; C(CH3)3), 1.52-1.55 (m, 8 H; CH2C3H7), 4.08-4.13 (t, 3J(H, H) = 7 Hz, 4 H; OCH2C4H9), 4.16-4.17 (d, 3J(H, H) = 5.5 Hz, 8 H; CH2NHtBoc), 4.57-4.58 (d, 3J(H, H) = 5.5 Hz, 8 H; CH2NHCOPyr), 5.02 (s, 4 H; OCH2CO2R), 7.11 (s, 2 H; ArH), 7.18 (s, 2 H; ArH), 7.37 (s, 4 H; ArH), 7.42-7.46 (t, 4 H; NHtBoc), 7.56 (s, 4 H; ArH), 7.64 (s, 4 H; PyrH), 10.02-10.06 (t, 4 H; NHCOPyr); 13C NMR (100 MHz, [D6]DMSO):  = 13.5 (CH3), 21.0, 27.7, 27.9 (CH2), 28.1 (C(CH3)3), 41.8 (CH2NHCOPyr), 44.5 (CH2NHtBoc), 64.9 (CH2), 65.0 (OCH2CO2R), 77.8 (C(CH3)3), 111.2 (PyrCH), 123.8, 125.5, 128.1, 128.9 (ArCH), 138.3, 140.2, 140.3, 141.2 (ArC), 149.5 (PyrC), 155.6 (CO), 163.8 (PyrC), 168.1, 168.5 (CO); IR : max = 3309 (NH), 1798, 1685, 1665 (CO), 1528 cm-1 (NH); MS (FAB+): m/z (%): 1514 (100) [M + Na]+; elemental analysis calcd. (%) for C80H102N10O18 + 5.H2O (1581.82): C 60.75 H 7.14 N 8.85; found C 60.93 H 6.99 N 8.31.

**Tetrakis-dipicolinoyl macrotricycle 4.** TFA (1.5 mL) was added to a suspension of the tetra N-Boc derivative **13** (190 mg, 0.128 mmol) in DCM (1.5 mL) cooled in an ice bath. The reaction mixture was stirred at 0 oC for 30 min. and then after removal of the ice bath for further 2 h. The solvent was removed in vacuo to give a crude solid that was triturated with diethyl ether (15 mL). The white solid that precipitated was filtered to give the corresponding tetra TFA salt of **13** (203 mg, 94 %). 1H NMR (400 MHz, [D6]DMSO):= 0.87-0.89 (t, 3J(H, H) = 7 Hz, 6 H; CH3), 1.23-1.26 (m, 8 H; C2H4CH3), 1.52-1.54 (m, 8 H; CH2C3H7), 4.12-4.15 (t, 3J(H, H) = 7 Hz, 4 H; OCH2C4H9), 4.18 (bs, 8 H; CH2NH3+TFA),), 4.57 (s, 8 H; CH2NHCOPyr), 5.12 (s, 4 H; OCH2CO2R), 7.23 (s, 2 H; ArH), 7.47 (s, 2 H; ArH), 7.56 (s, 4 H; ArH), 7.61 (s, 4 H; PyrH), 7.86 (s, 4 H; ArH), 8.34 (bs, 12 H; NH3+TFA), 9.82 (t, 4 H; NHCOPyr); 13C NMR (100 MHz, [D6]DMSO):  = 13.8 (CH3), 22.2, 27.5, 28.2 (CH2), 41.5 (CH2NHCOPyr), 43.0 (CH2NH3+), 65.7 (CH2), 65.9 (OCH2CO2R), 111.7 (PyrCH), 120.1, 125.5, 126.8, 128.6 (ArCH), 137.8 138.5, 139.3, 142.1 (ArC), 151.9, 164.3 (PyrC), 166.5, 166.7 (CO); MS (ES+): m/z (%): 1091 (25) [free amine C60H70N10O10 + H]+, 546 (100) [free amine C60H70N10O10 + 2 H]2+. A solution of dipicolinoyl spacer **11** (155 mg, 0.24 mmol) in dry THF (360 mL, [**11**] ~ 0.5 mM) was added dropwise over 8 h to a solution of the tetra TFA salt of **13** (200 mg, 0.12 mmol, previously dissolved in dry DMF (8 mL)) and *i*Pr2NEt (0.56 mL, 3.2 mmol) in dry THF (380 mL, [TFA salt of **13**] ~ 0.25 mM) under N2 and at r.t. The reaction mixture was stirred vigorously for 45 h at r.t. and the solvent was removed under reduced pressure (adding toluene (3 x 15 mL) to facilitate DMF removal) to give a crude solid that was taken up in CHCl3 (50 mL) and washed with HCl aq. (1 N, 50 mL). The aqueous layer was extracted with further CHCl3 (50 mL) and the combined organic extracts were washed with NaHCO3 saturated aqueous solution (80 mL), brine (80 mL), dried (Na2SO4) and filtered. Removal of the solvent in vacuo gave a solid that was purified by flash column chromatography (eluent CHCl3/methanol 99:1). The desired receptor **4** (23 mg, 11 %) was obtained as a white solid. Rf = 0.3. (DCM/methanol 95:5); 1H NMR (400 MHz, CDCl3/CD3OH 92:8):  0.81-0.84 (t, 3J(H, H) = 7 Hz, 12 H; CH3), 1.21-1.27 (m, 16 H; C2H4CH3), 1.57-1.63 (m, 8 H; CH2C3H7), 4.12-4.15 (t, 3J(H, H) = 7 Hz, 8 H; OCH2C4H9), 4.47-4.57 (m, 3J(H, H) = 5 Hz, 16 H; CH2NHCOPyr), 4.81 (s, 8 H; OCH2CO2R), 7.03 (s, 4 H; ArH), 7.48 (s, 8 H; ArH), 7.81 (s, 8 H; PyrH), 8.77 (s, 8 H; NHCOPyr); 13C-NMR (100 MHz, CDCl3/CD3OH 92:8): 13.9 (CH3), 22.3, 28.0, 28.2, (CH2), 44.5 (CH2NHCOPyr), 64.9 (CH2), 66.3 (OCH2CO2R), 111.6 (PyrCH), 123.8, 128.5 (ArCH), 136.9, 140.0 (ArC), 151.0, 163.8 (PyrC), 166.9, 168. (CO); HRMS (FAB+): m/z mass calcd for C88H97N12O20 1641.6942 found 1641.6899.

**2- 1H-NMR spectral changes and titration curve of receptors 3 and 4 with guest 2**

**a) Titration of bis-dipicolinoyl-bis-isophthaloyl receptor 3 with octyl -d-glucopyranoside 2.** Aliquots from a solution of the guest octyl -d-glucopyranoside **2** in CDCl3/CD3OH 96:4 (2 L, 0.07 mol, 0.1 equivalent, [**2**] = 35 mm) were added to 700 L of a solution of bis-dipicolinoyl-bis-isophthaloyl receptor **3** in CDCl3/CD3OH 96:4 (0.7 mol, [**3**] = 1 mm) in a NMR sample tube. The sample tube was shaken carefully after each addition and 1H-NMR spectra were recorded at 30 oC. The 1H-NMR spectral changes observed upon addition of 0.3, 0.6 and 1 equivalents respectively of **2** are shown below. The broadening of the signals indicated that interactions between the receptor and the saccharide guest were taking place, although the data do not to allow any estimation of *K*a.

**3**

**3** + 0.3 equiv. **2**

**3** + 0.6 equiv. **2**

**3** + 1 equiv. **2**

**b) Titration of tetrakis-dipicolinoyl receptor 4 with octyl **-d-**glucopyranoside 2.** Aliquots from a solution of the guest octyl -d-glucopyranoside **2** in CDCl3/CD3OH 99:1 (3.5 L, 0.07 mol, 0.1 equivalent, [**2**] = 20 mm) were added to 700 L of a solution of tetrakis-dipicolinoyl receptor **4** in CDCl3/CD3OH 99:1 (0.7 mol, [**4**] = 1 mm) in a NMR sample tube. The sample tube was shaken carefully after each addition and 1H-NMR spectra were registered at 30 oC. The 1H-NMR spectral changes observed upon addition of 0.5, 1 and 3 equivalents respectively of **2** are shown below. The variations in the chemical shift of the NH protons of receptor **4** upon addition of the sugar **2** were introduced in a non-linear least squares curve-fitting program implemented within Excel (see next page). However, the poor fit precluded calculation of a binding constant.

**4**

**4** + 0.5 equiv. **2**

**4** + 1 equiv. **2**

**4** + 3 equiv. **2**

Theoretical () and experimental (■) binding curves for NMR titration of **4** + **2**. The theoretical curve corresponds to *K*a ~ 400 m-1

**3- Fluorescence spectral changes and titration curves of receptors 3 and 4 with guest 2**

a) **Titration of bis-dipicolinoyl-bis-isophthaloyl receptor 3 with octyl **-d-g**lucopyranoside 2.** Aliquots from a solution of **2** (2 L, 2.4 x 10-4 mol, [**2**] = 0.12 mm) in CHCl3 (previously washed with water, dried over K2CO3 and distilled using a Vigreux column 20 cm long) were added to 2 mL of a solution of receptor **3** (1.7 x 10-3 mol, [**3**] = 0.85 m) in a fluorimeter cell of 1 cm width. The cell was shaken carefully after each addition and allowed to equilibrate for 10 min before recording the spectra. The excitation wavelength was set at 260 nm. The intensity of the emission spectra of receptor **3** decreased upon addition of guest **2**, as shown below. The maximum emission intensity values corresponded to 387 nm, and were introduced in a specifically written non-linear least squares curve fitting program implemented within Excel for calculation of a binding constant *K*a. A binding curve assuming a 1:1 stoichiometry was obtained, with the corresponding *K*a of approximately 3 x 107 m-1 (see next page). However, due to the poor fit, and to the complex nature of the changes in the emission spectrum (e.g. lack of an isosbestic point), this binding constant is not considered reliable.

a)

a)

Theoretical () and experimental (■) binding curves for fluorescence titration of **3** + **2**. The theoretical curve corresponds to *K*a ~ 3  107 m-1

b) **Titration of tetrakis-dipicolinoyl receptor 4 with octyl **-d-g**lucopyranoside 2.** Aliquots from a solution of **2** (2 L, 2.4 x 10-4 mol, [**2**] = 0.12 mm) in CHCl3 (treated as indicated in titration of receptor **3**) were added to 2 mL of a solution of receptor **4** (1.7 x 10-3 mol, [**4**] = 0.85 m) in a fluorimeter cell of 1 cm width. The cell was shaken carefully after each addition and allowed to equilibrate for 10 min before recording the spectra. The excitation wavelength was set at 260 nm. The intensity of the emission spectra of receptor **4** decreased upon addition of guest **2**, as shown below. The maximum emission intensity values corresponded to 387 nm and were introduced in a specifically written non-linear least squares curve fitting program implemented within Excel for calculation of a binding constant *K*a.A binding curve assuming a 1:1 stoichiometry was obtained, with the corresponding *K*a of approximately 2 x 107 m-1 (see next page). However, due to the poor fit, and to the complex nature of the changes in the emission spectrum, this binding constant is not considered reliable.

Theoretical () and experimental (■) binding curves for fluorescence titration of **4** + **2**. The theoretical curve corresponds to *K*a ~ 2  107 m-1

**4-Typical procedure for extraction of sugar from aqueous solution into organic solvent**

A solution of macrotricycle **3** (2.8 mg, 1.77 mmol) in CHCl3 (5 mL, [**3**] = 0.35 mm) and a solution of d-glucose monohydrate (990 mg, 5 mmol) in water (5 mL, [glucose] = 1 m) were warmed in a water bath at 30 oC for 20 min. The two solutions were mixed together and shaken vigorously for 3 min. The solutions were allowed to stand and the two phases to separate for 30 min. The organic phase was removed with a pipette and filtered through hydrophobic filter paper (Whatman 1PS phase separator paper), dried (Na2SO4) and filtered again though ordinary filter paper. The solvent was removed in vacuo to give a solid residue that was redissolved in [D6]DMSO and analysed by 1H NMR. The ratio of carbohydrate:receptor was determined by integrating signals from aromatic receptor protons against those from the anomeric OH (see below).

2

0.30

0.29

6.9

6.80

6.70

6.60

6.50

6.40

6.30

6.20

The above volumes (5 mL CHCl3, 5 mL water) were used in all extractions; where necessary, different substrate concentrations were achieved by altering the weight of sugar.

1. A. P. Davis and R. S. Wareham, *Angew. Chem., Int. Ed.*, 1998, **37**, 2270. [↑](#footnote-ref-2)
2. T. J. Ryan, G. Lecollinet, T. Velasco and A. P. Davis, *Proc. Natl. Acad. Sci. USA*, 2002, **99**, 4863. [↑](#footnote-ref-3)
